# Supplementary material for: Effects of Chemical and Biological Fungicide Applications on Sexual Sporulation of Rhizoctonia solani AG-3 TB on Tobacco
Source: MDPI journal article supplement (doi:10.3390/life14030404), 2024-03-18
Supplement: s1 [file s1]

**Table S1.** GC-MS analysis results of A8 FL.

| Name                                   | Molecular formula                                             | Similarity | Molecular weight | Classification        |
|----------------------------------------|---------------------------------------------------------------|------------|------------------|-----------------------|
| naphthalene                            | C <sub>10</sub> H <sub>8</sub>                                | 98         | 128              | aromatic hydrocarbons |
| paraxylene                             | C <sub>8</sub> H <sub>10</sub>                                | 98         | 106              | aromatic hydrocarbons |
| 1,2,3,5-tetramethylbenzene             | C <sub>10</sub> H <sub>14</sub>                               | 98         | 134              | aromatic hydrocarbons |
| palmitoleic acid                       | C <sub>16</sub> H <sub>30</sub> O <sub>2</sub>                | 97         | 254              | fatty acids           |
| 2-dimethylbenzene                      | C <sub>8</sub> H <sub>10</sub>                                | 97         | 106              | aromatic hydrocarbons |
| dibutylphthalate                       | C <sub>16</sub> H <sub>22</sub> O <sub>4</sub>                | 97         | 278              | ester                 |
| 2-Ethyl-1,4-dimethylbenzene            | C <sub>10</sub> H <sub>14</sub>                               | 97         | 134              | aromatic hydrocarbons |
| 1-Ethyl-3-methylbenzene                | C <sub>9</sub> H <sub>12</sub>                                | 97         | 120              | aromatic hydrocarbons |
| 1-Ethyl-2,4-dimethylbenzene            | C <sub>10</sub> H <sub>14</sub>                               | 97         | 134              | aromatic hydrocarbons |
| 1-Methyl-3-(1-methylethyl) -benzene    | C <sub>10</sub> H <sub>14</sub>                               | 97         | 134              | aromatic hydrocarbons |
| 1,2,4,5-tetramethylbenzene             | C <sub>10</sub> H <sub>14</sub>                               | 97         | 134              | aromatic hydrocarbons |
| 1,2,3,5-tetramethylbenzene             | C <sub>10</sub> H <sub>14</sub>                               | 97         | 134              | aromatic hydrocarbons |
| 1,2,3,4-tetramethylbenzene             | C <sub>10</sub> H <sub>14</sub>                               | 97         | 134              | aromatic hydrocarbons |
| n-hexadecanoic acid                    | C <sub>16</sub> H <sub>32</sub> O <sub>2</sub>                | 96         | 256              | fatty acids           |
| mesitylene                             | C <sub>9</sub> H <sub>12</sub>                                | 96         | 120              | aromatic hydrocarbons |
| 3 furan methanol                       | C <sub>5</sub> H <sub>6</sub> O <sub>2</sub>                  | 96         | 98               | alcohols              |
| 2-Ethyl-1,4-dimethylbenzene            | C <sub>10</sub> H <sub>14</sub>                               | 96         | 134              | aromatic hydrocarbons |
| 2-methylnaphthalene                    | C <sub>11</sub> H <sub>10</sub>                               | 96         | 142              | aromatic hydrocarbons |
| 1-Ethyl-3,5-dimethylbenzene            | C <sub>10</sub> H <sub>14</sub>                               | 96         | 134              | aromatic hydrocarbons |
| 1-Ethyl-2-methylbenzene                | C <sub>9</sub> H <sub>12</sub>                                | 96         | 120              | aromatic hydrocarbons |
| 1-Methyl-3- ( 1-methylethyl ) -benzene | C <sub>10</sub> H <sub>14</sub>                               | 96         | 134              | aromatic hydrocarbons |
| 1,2,3-Trimethylbenzene                 | C <sub>9</sub> H <sub>12</sub>                                | 96         | 120              | aromatic hydrocarbons |
| 1,2,3,5-Tetramethylbenzene             | C <sub>10</sub> H <sub>14</sub>                               | 96         | 134              | aromatic hydrocarbons |
| Indene                                 | C <sub>9</sub> H <sub>10</sub>                                | 95         | 118              | aromatic hydrocarbons |
| pentadecanoic acid                     | C <sub>15</sub> H <sub>30</sub> O <sub>2</sub>                | 95         | 242              | fatty acids           |
| diisocapryl phthalate                  | C <sub>24</sub> H <sub>38</sub> O <sub>4</sub>                | 95         | 390              | ester                 |
| paraxylene                             | C <sub>8</sub> H <sub>10</sub>                                | 95         | 106              | aromatic hydrocarbons |
| propylbenzene                          | C <sub>9</sub> H <sub>12</sub>                                | 95         | 120              | aromatic hydrocarbons |
| 2,3-Dihydro-5-methyl-1H-indene         | C <sub>10</sub> H <sub>12</sub>                               | 95         | 132              | aromatic hydrocarbons |
| 2- ( Dodecyloxy ) -ethanol             | C <sub>14</sub> H <sub>30</sub> O <sub>2</sub>                | 95         | 230              | alcohols              |
| 2- ( 2-methylphenyl ) ethylene oxide   | C <sub>9</sub> H <sub>10</sub> O                              | 95         | 134              | alkanes               |
| 1-Methyl-4- ( 1-methylpropyl-benzene ) | C <sub>11</sub> H <sub>16</sub>                               | 95         | 148              | aromatic hydrocarbons |
| 1-Methyl-3-propylbenzene               | C <sub>10</sub> H <sub>14</sub>                               | 95         | 134              | aromatic hydrocarbons |
| 1,3-Dimethylbenzene                    | C <sub>8</sub> H <sub>10</sub>                                | 95         | 106              | aromatic hydrocarbons |
| ( z ) Oleamide                         | C <sub>18</sub> H <sub>35</sub> NO                            | 95         | 281              | amides                |
| ( 1-methylpropyl ) -benzene            | C <sub>10</sub> H <sub>14</sub>                               | 95         | 134              | aromatic hydrocarbons |
| N-octadecyl acetate                    | C <sub>20</sub> H <sub>40</sub> O <sub>2</sub>                | 94         | 312              | ester                 |
| ethylene glycol diacetate              | C <sub>22</sub> H <sub>44</sub> O <sub>2</sub>                | 94         | 340              | ester                 |
| myristic acid                          | C <sub>14</sub> H <sub>28</sub> O <sub>2</sub>                | 94         | 228              | fatty acids           |
| Nonadecyl heptafluorobutyrate          | C <sub>23</sub> H <sub>39</sub> F <sub>7</sub> O <sub>2</sub> | 94         | 480              | ester                 |

|                                                               |                                                |    |     |                       |
|---------------------------------------------------------------|------------------------------------------------|----|-----|-----------------------|
| o-cymene                                                      | C <sub>10</sub> H <sub>14</sub>                | 94 | 134 | aromatic hydrocarbons |
| dimethylphthalate                                             | C <sub>10</sub> H <sub>10</sub> O <sub>4</sub> | 94 | 194 | ester                 |
| 1-heptacosanol                                                | C <sub>27</sub> H <sub>56</sub> O              | 94 | 396 | alcohols              |
| 3-hydroxydecanoic acid (3hd)                                  | C <sub>10</sub> H <sub>20</sub> O <sub>3</sub> | 94 | 188 | fatty acids           |
| 2-Ethyl-1,3-dimethylbenzene                                   | C <sub>10</sub> H <sub>14</sub>                | 94 | 134 | aromatic hydrocarbons |
| 2,3-Dihydro-4-methyl-1 ( H ) -indene                          | C <sub>10</sub> H <sub>12</sub>                | 94 | 132 | aromatic hydrocarbons |
| 1-Vinyl-4-ethylbenzene                                        | C <sub>10</sub> H <sub>12</sub>                | 94 | 132 | aromatic hydrocarbons |
| 1-Ethyl-2,4-dimethylbenzene                                   | C <sub>10</sub> H <sub>14</sub>                | 94 | 134 | aromatic hydrocarbons |
| 1-Methyl-4-propylbenzene                                      | C <sub>10</sub> H <sub>14</sub>                | 94 | 134 | aromatic hydrocarbons |
| 1-Methyl-2-propylbenzene                                      | C <sub>10</sub> H <sub>14</sub>                | 94 | 134 | aromatic hydrocarbons |
| 1,2-Benzenedicarboxylic acid, bis<br>( 2-methylpropyl ) ester | C <sub>16</sub> H <sub>22</sub> O <sub>4</sub> | 94 | 278 | ester                 |
| phthalate (2-ethylhexyl) phthalate                            | C <sub>24</sub> H <sub>38</sub> O <sub>4</sub> | 93 | 390 | ester                 |
| Phthalic acid, hexyl-3-isobutyl ester                         | C <sub>18</sub> H <sub>26</sub> O <sub>4</sub> | 93 | 306 | ester                 |
| Phthalic acid, hept-3-yl isobutyl ester                       | C <sub>19</sub> H <sub>28</sub> O <sub>4</sub> | 93 | 320 | ester                 |
| Nonadecyl acetate                                             | C <sub>21</sub> H <sub>42</sub> O <sub>2</sub> | 93 | 326 | ester                 |
| 2 ' , 4 ' -Dihydroxy-3 ' -methylacetophenone                  | C <sub>9</sub> H <sub>10</sub> O <sub>3</sub>  | 93 | 166 | ketone                |
| 1-Methyl-4-propylbenzene                                      | C <sub>10</sub> H <sub>14</sub>                | 93 | 134 | aromatic hydrocarbons |
| ( 9E ) -9-hexadecacarbon                                      | C <sub>26</sub> H <sub>52</sub>                | 93 | 364 | alkanes               |
| pentamethylbenzene                                            | C <sub>11</sub> H <sub>16</sub>                | 92 | 148 | aromatic hydrocarbons |
| Cis-10-heptadecaenoic acid                                    | C <sub>17</sub> H <sub>32</sub> O <sub>2</sub> | 92 | 268 | fatty acids           |
| Phthalic acid, bis ( 7-methyloctyl ) ester                    | C <sub>26</sub> H <sub>42</sub> O <sub>4</sub> | 92 | 418 | ester                 |
| cyclopropylbenzene                                            | C <sub>9</sub> H <sub>10</sub>                 | 92 | 118 | aromatic hydrocarbons |
| 2-acetyl-resorcinol                                           | C <sub>8</sub> H <sub>8</sub> O <sub>3</sub>   | 92 | 152 | phenols               |
| 2,2 ' -Methylenebis<br>( 6-tert-butyl-4-methylphenol )        | C <sub>23</sub> H <sub>32</sub> O <sub>2</sub> | 92 | 340 | phenols               |
| 1-Methyl-2-propylbenzene                                      | C <sub>10</sub> H <sub>14</sub>                | 92 | 134 | aromatic hydrocarbons |
| 1,4-Diethyl-2-methylbenzene                                   | C <sub>11</sub> H <sub>16</sub>                | 92 | 148 | aromatic hydrocarbons |
| 1,3-diethylbenzene                                            | C <sub>10</sub> H <sub>14</sub>                | 92 | 134 | aromatic hydrocarbons |
| ( 1-methylpropyl ) -benzene                                   | C <sub>10</sub> H <sub>14</sub>                | 92 | 134 | aromatic hydrocarbons |
| Tetrapentadecane                                              | C <sub>54</sub> H <sub>110</sub>               | 91 | 758 | alkanes               |
| Phthalic acid, bis ( 7-methyloctyl ) ester                    | C <sub>26</sub> H <sub>42</sub> O <sub>4</sub> | 91 | 418 | ester                 |
| Adipic acid, bis ( 2-ethylhexyl ) ester                       | C <sub>22</sub> H <sub>42</sub> O <sub>4</sub> | 91 | 370 | ester                 |
| Diisooctyl adipate                                            | C <sub>22</sub> H <sub>42</sub> O <sub>4</sub> | 91 | 370 | ester                 |
| N- ( 2-phenylethyl ) -acetamide                               | C <sub>10</sub> H <sub>13</sub> NO             | 91 | 163 | amides                |
| 7-Ethyl-1,3,5-cycloheptatriene                                | C <sub>9</sub> H <sub>12</sub>                 | 91 | 120 | alkenes               |
| 2-Ethyl-1,4-dimethylbenzene                                   | C <sub>10</sub> H <sub>14</sub>                | 91 | 134 | aromatic hydrocarbons |
| 2-Hydroxy-cyclopentadecanone                                  | C <sub>15</sub> H <sub>28</sub> O <sub>2</sub> | 91 | 240 | ketone                |
| 2-furanemethanol                                              | C <sub>5</sub> H <sub>6</sub> O <sub>2</sub>   | 91 | 98  | alcohols              |
| 2- ( hexadecyloxy ) -ethanol                                  | C <sub>18</sub> H <sub>38</sub> O <sub>2</sub> | 91 | 286 | alcohols              |
| 1,2-Benzenedicarboxylic acid, dinonyl<br>ester                | C <sub>26</sub> H <sub>42</sub> O <sub>4</sub> | 91 | 418 | ester                 |
| Cis-acetic acid                                               | C <sub>18</sub> H <sub>34</sub> O <sub>2</sub> | 90 | 282 | fatty acids           |

|                                                                        |                                                                |    |     |                       |
|------------------------------------------------------------------------|----------------------------------------------------------------|----|-----|-----------------------|
| 5-methyl-resorcinol                                                    | C <sub>7</sub> H <sub>8</sub> O <sub>2</sub>                   | 90 | 124 | phenols               |
| 3-methyl-1,2-cyclopentanedione                                         | C <sub>6</sub> H <sub>8</sub> O <sub>2</sub>                   | 90 | 112 | ketone                |
| 3,4-Dimethylisopropylbenzene                                           | C <sub>11</sub> H <sub>16</sub>                                | 90 | 148 | aromatic hydrocarbons |
| 2-bromohexane                                                          | C <sub>6</sub> H <sub>13</sub> Br                              | 90 | 164 | alkanes               |
| 2-Hydroxy-cyclopentadecanone                                           | C <sub>15</sub> H <sub>28</sub> O <sub>2</sub>                 | 90 | 240 | ketone                |
| 2- ( Tetradecyloxy ) -ethanol                                          | C <sub>16</sub> H <sub>34</sub> O <sub>2</sub>                 | 90 | 258 | alcohols              |
| 1- ( 2,5-dihydroxyphenyl ) -ethanone                                   | C <sub>8</sub> H <sub>8</sub> O <sub>3</sub>                   | 90 | 152 | ketone                |
| n-hexadecanoic acid                                                    | C <sub>16</sub> H <sub>32</sub> O <sub>2</sub>                 | 89 | 256 | fatty acids           |
| n-tetratriacontane                                                     | C <sub>34</sub> H <sub>70</sub>                                | 89 | 478 | alkanes               |
| n-hexatriacontane                                                      | C <sub>36</sub> H <sub>74</sub>                                | 89 | 506 | alkanes               |
| pentamethylbenzene                                                     | C <sub>11</sub> H <sub>16</sub>                                | 89 | 148 | aromatic hydrocarbons |
| hendecanoic acid                                                       | C <sub>11</sub> H <sub>22</sub> O <sub>2</sub>                 | 89 | 186 | fatty acids           |
| L- ( + ) -ascorbic acid 2,6-hexacosate                                 | C <sub>38</sub> H <sub>68</sub> O <sub>8</sub>                 | 89 | 652 | ester                 |
| 3,4-Dimethylisopropylbenzene                                           | C <sub>11</sub> H <sub>16</sub>                                | 89 | 148 | aromatic hydrocarbons |
| 2,4-Diethyl-1-methylbenzene                                            | C <sub>11</sub> H <sub>16</sub>                                | 89 | 148 | aromatic hydrocarbons |
| 1-Ethyl-4- ( 1-methylethyl ) -benzene                                  | C <sub>11</sub> H <sub>16</sub>                                | 89 | 148 | aromatic hydrocarbons |
| 1-Ethyl-3,5-dimethylbenzene                                            | C <sub>10</sub> H <sub>14</sub>                                | 89 | 134 | aromatic hydrocarbons |
| 1-Ethyl-2,3-dimethyl-benzene                                           | C <sub>10</sub> H <sub>14</sub>                                | 89 | 134 | aromatic hydrocarbons |
| 1-Methyl-4- ( 1-methylpropyl ) benzene                                 | C <sub>11</sub> H <sub>16</sub>                                | 89 | 148 | aromatic hydrocarbons |
| 1-Methyl-4- ( 1-methylpropyl ) benzene                                 | C <sub>11</sub> H <sub>16</sub>                                | 89 | 148 | aromatic hydrocarbons |
| 1,3-Dimethyl-5- ( 1-methylethyl )<br>-benzene                          | C <sub>11</sub> H <sub>16</sub>                                | 89 | 148 | aromatic hydrocarbons |
| ( R ) -6- ( phenylmethyl ) -4,7-diazaspiro<br>[ 2.5 ] octane-5,8-dione | C <sub>13</sub> H <sub>14</sub> N <sub>2</sub> O <sub>2</sub>  | 89 | 230 | ketone                |
| ( 11Z ) -11-pentadecene-1-ol                                           | C <sub>15</sub> H <sub>30</sub> O                              | 89 | 226 | alcohols              |
| Tetrahydro-2 ( H ) -pyran-2-methanol                                   | C <sub>6</sub> H <sub>12</sub> O <sub>2</sub>                  | 88 | 116 | alcohols              |
| hexatriacontane                                                        | C <sub>36</sub> H <sub>74</sub>                                | 88 | 506 | alkanes               |
| Phthalic acid, bis ( 7-methyloctyl ) ester                             | C <sub>26</sub> H <sub>42</sub> O <sub>4</sub>                 | 88 | 418 | ester                 |
| 2-Hydroxy-3-methyl-2-cyclopenten-1-one                                 | C <sub>6</sub> H <sub>8</sub> O <sub>2</sub>                   | 88 | 112 | ketone                |
| 2-methyl-1,3-benzenediol                                               | C <sub>7</sub> H <sub>8</sub> O <sub>2</sub>                   | 88 | 124 | phenols               |
| 1-Ethyl-3- ( 1-methylethyl ) -benzene                                  | C <sub>11</sub> H <sub>16</sub>                                | 88 | 148 | aromatic hydrocarbons |
| 1,2-Benzenedicarboxylic acid, dinonyl<br>ester                         | C <sub>26</sub> H <sub>42</sub> O <sub>4</sub>                 | 88 | 418 | ester                 |
| tetratetracontane                                                      | C <sub>44</sub> H <sub>90</sub>                                | 87 | 618 | alkanes               |
| dodecanoic acid                                                        | C <sub>12</sub> H <sub>24</sub> O <sub>2</sub>                 | 87 | 200 | fatty acids           |
| eicosane                                                               | C <sub>20</sub> H <sub>42</sub>                                | 87 | 282 | alkanes               |
| Dichloroacetic acid, trideca-2-alkynyl<br>ester                        | C <sub>15</sub> H <sub>24</sub> Cl <sub>2</sub> O <sub>2</sub> | 87 | 306 | ester                 |
| 3,4-Dimethylisopropylbenzene                                           | C <sub>11</sub> H <sub>16</sub>                                | 87 | 148 | aromatic hydrocarbons |
| 3,4-Dimethylisopropylbenzene                                           | C <sub>11</sub> H <sub>16</sub>                                | 87 | 148 | aromatic hydrocarbons |
| 2-Hydroxydecanoic acid                                                 | C <sub>10</sub> H <sub>20</sub> O <sub>3</sub>                 | 87 | 188 | fatty acids           |
| 2-Methyl-1,4-benzenedialdehyde                                         | C <sub>9</sub> H <sub>8</sub> O <sub>2</sub>                   | 87 | 148 | aromatic aldehydes    |

|                                                   |                                                |    |     |                       |
|---------------------------------------------------|------------------------------------------------|----|-----|-----------------------|
| 2,4-di-tert-butylphenol                           | C <sub>14</sub> H <sub>22</sub> O              | 87 | 206 | phenols               |
| 1-Methyl-4- ( 1-methylpropyl ) benzene            | C <sub>11</sub> H <sub>16</sub>                | 87 | 148 | aromatic hydrocarbons |
| 1,3-Diethyl-5-methylbenzene                       | C <sub>11</sub> H <sub>16</sub>                | 87 | 148 | aromatic hydrocarbons |
| 1,2-Benzenedicarboxylic acid, dinonyl ester       | C <sub>26</sub> H <sub>42</sub> O <sub>4</sub> | 87 | 418 | ester                 |
| 1- ( 2-hydroxy-4-methoxyphenyl )<br>-ethanone     | C <sub>9</sub> H <sub>10</sub> O <sub>3</sub>  | 87 | 166 | ketone                |
| Cis-9-hexadecene                                  | C <sub>16</sub> H <sub>30</sub> O              | 86 | 238 | fatty acids           |
| dodecanoic acid                                   | C <sub>12</sub> H <sub>24</sub> O <sub>2</sub> | 86 | 200 | fatty acids           |
| tetratriacontane                                  | C <sub>34</sub> H <sub>70</sub>                | 86 | 478 | alkanes               |
| Phthalic acid, bis ( 7-methyloctyl ) ester        | C <sub>26</sub> H <sub>42</sub> O <sub>4</sub> | 86 | 418 | ester                 |
| dicumyl peroxide                                  | C <sub>18</sub> H <sub>22</sub> O <sub>2</sub> | 86 | 270 | aromatic hydrocarbons |
| 7-Hexadecen-1-ol                                  | C <sub>16</sub> H <sub>30</sub> O              | 86 | 238 | alcohols              |
| 7- ( 2-octyl-1-cyclopropene-1-yl )<br>-1-heptanol | C <sub>18</sub> H <sub>34</sub> O              | 86 | 266 | alcohols              |
| 4-Methyl-1,2-benzenediol                          | C <sub>7</sub> H <sub>8</sub> O <sub>2</sub>   | 86 | 124 | phenols               |
| 3-hydroxy myristic acid                           | C <sub>14</sub> H <sub>28</sub> O <sub>3</sub> | 86 | 244 | fatty acids           |
| 3-Methyl-2,5-furandione                           | C <sub>5</sub> H <sub>4</sub> O <sub>3</sub>   | 86 | 112 | ketone                |
| 2 ' -Hydroxy-4 ' -methoxyacetophenone,<br>acetate | C <sub>11</sub> H <sub>12</sub> O <sub>4</sub> | 86 | 208 | ester                 |
| 2 ' , 4 ' -dimethoxyacetophenone                  | C <sub>10</sub> H <sub>12</sub> O <sub>3</sub> | 86 | 180 | ketone                |
| 2,3-Dihydro-4,7-dimethyl-1H-indene                | C <sub>11</sub> H <sub>14</sub>                | 86 | 146 | aromatic hydrocarbons |
| 2,2,4,6,6-pentamethyl-heptane                     | C <sub>12</sub> H <sub>26</sub>                | 86 | 170 | alkanes               |
| 1-Ethyl-4- ( 1-methylethyl ) -benzene             | C <sub>11</sub> H <sub>16</sub>                | 86 | 148 | aromatic hydrocarbons |
| 1-Ethyl-2,4,5-trimethylbenzene                    | C <sub>11</sub> H <sub>16</sub>                | 86 | 148 | aromatic hydrocarbons |
| 1,3-Dimethyl-5- ( 1-methylethyl )<br>-benzene     | C <sub>11</sub> H <sub>16</sub>                | 86 | 148 | aromatic hydrocarbons |
| ( 1,1-dimethylpropyl ) -benzene                   | C <sub>11</sub> H <sub>16</sub>                | 86 | 148 | aromatic hydrocarbons |

---
